# Supplementary material
Source: PubMed Central journal article supplement (PMC2567402)
Supplement: emboj2008172s1.pdf [file emboj2008172s1.pdf]

**Supplementary Table 1**

|               | Gli1 <sup>high</sup><br>MBs |       |        | Gli1 <sup>low</sup><br>MBs |       |        | p      |
|---------------|-----------------------------|-------|--------|----------------------------|-------|--------|--------|
|               | med                         | min   | max    | med                        | min   | max    |        |
| downregulated |                             |       |        |                            |       |        |        |
| let7a         | 0.264                       | 0.104 | 0.622  | 0.532                      | 0.066 | 1.990  | 0.0014 |
| let7e         | 0.055                       | 0.010 | 0.193  | 0.145                      | 0.030 | 0.283  | 0.0097 |
| let7f         | 0.140                       | 0.030 | 0.313  | 0.437                      | 0.036 | 0.604  | 0.0012 |
| miR-7         | 0.128                       | 0.011 | 0.567  | 0.6                        | 0.061 | 8.516  | 0.0011 |
| miR-9         | 0.198                       | 0.076 | 1.371  | 0.990                      | 0.061 | 2.780  | 0.0108 |
| miR-25        | 3.000                       | 0.000 | 6.327  | 5.341                      | 0.448 | 11.827 | 0.0223 |
| miR-30b       | 0.209                       | 0.028 | 0.579  | 0.435                      | 0.042 | 0.900  | 0.0120 |
| miR-100       | 0.579                       | 0.096 | 2.568  | 2.547                      | 0.610 | 7.955  | 0.0039 |
| miR-103       | 0.136                       | 0.021 | 0.299  | 0.330                      | 0.125 | 0.626  | 0.0350 |
| miR-124a      | 0.023                       | 0.007 | 0.082  | 0.179                      | 0.016 | 0.295  | 0.0001 |
| miR-125b      | 0.244                       | 0.045 | 0.680  | 0.595                      | 0.233 | 2.269  | 0.0003 |
| miR-132       | 0.123                       | 0.022 | 0.449  | 0.230                      | 0.107 | 0.700  | 0.0039 |
| miR-135a      | 0.132                       | 0.002 | 3.731  | 2.610                      | 0.000 | 26.612 | 0.0014 |
| miR-135b      | 0.037                       | 0.001 | 0.587  | 3.838                      | 0.579 | 19.448 | 0.0001 |
| miR-142-5p    | 1.090                       | 0.313 | 7.069  | 4.250                      | 0.681 | 27.295 | 0.0044 |
| miR-143       | 0.419                       | 0.049 | 1.044  | 0.817                      | 0.222 | 1.600  | 0.0069 |
| miR-150       | 0.119                       | 0.022 | 0.460  | 0.329                      | 0.087 | 0.892  | 0.0069 |
| miR-153       | 0.043                       | 0.004 | 0.337  | 0.656                      | 0.031 | 4.404  | 0.0002 |
| miR-181c      | 0.241                       | 0.019 | 0.687  | 0.803                      | 0.000 | 3.709  | 0.0018 |
| miR-190       | 0.123                       | 0.000 | 0.381  | 0.524                      | 0.063 | 1.059  | 0.0003 |
| miR-191       | 0.269                       | 0.041 | 1.338  | 0.819                      | 0.104 | 2.067  | 0.0010 |
| miR-203       | 0.252                       | 0.000 | 3.865  | 3.322                      | 0.102 | 67.297 | 0.0010 |
| miR-324-3p    | 0.098                       | 0.005 | 0.248  | 0.275                      | 0.046 | 0.669  | 0.0069 |
| miR-324-5p    | 0.057                       | 0.019 | 0.252  | 0.178                      | 0.053 | 0.600  | 0.0018 |
| miR-326       | 0.047                       | 0.000 | 0.139  | 0.130                      | 0.038 | 0.418  | 0.0005 |
| miR-331       | 0.101                       | 0.031 | 0.256  | 0.260                      | 0.131 | 0.996  | 0.0001 |
| miR-338       | 0.039                       | 0.000 | 0.256  | 0.486                      | 0.036 | 1.850  | 0.0001 |
| miR-425       | 0.166                       | 0.013 | 0.304  | 0.311                      | 0.142 | 0.983  | 0.0030 |
| upregulated   |                             |       |        |                            |       |        |        |
| miR-199b      | 9.343                       | 0.956 | 75.273 | 1.093                      | 0.002 | 9.192  | 0.0001 |
| miR-214       | 6.618                       | 1.612 | 10.378 | 0.746                      | 0.370 | 3.201  | 0.0014 |

List of microRNAs differentially expressed in Gli1<sup>high</sup> medulloblastomas (MB) compared to other MBs (Gli1<sup>low</sup>).

Median, minimum and maximum values are represented for each sample group. P indicates the significance of the difference (Mann-Whitney test).
