# Supplementary material
Source: PubMed Central journal article supplement (PMC2567402)
Supplement: emboj2008172s2.pdf [file emboj2008172s2.pdf]

**A**

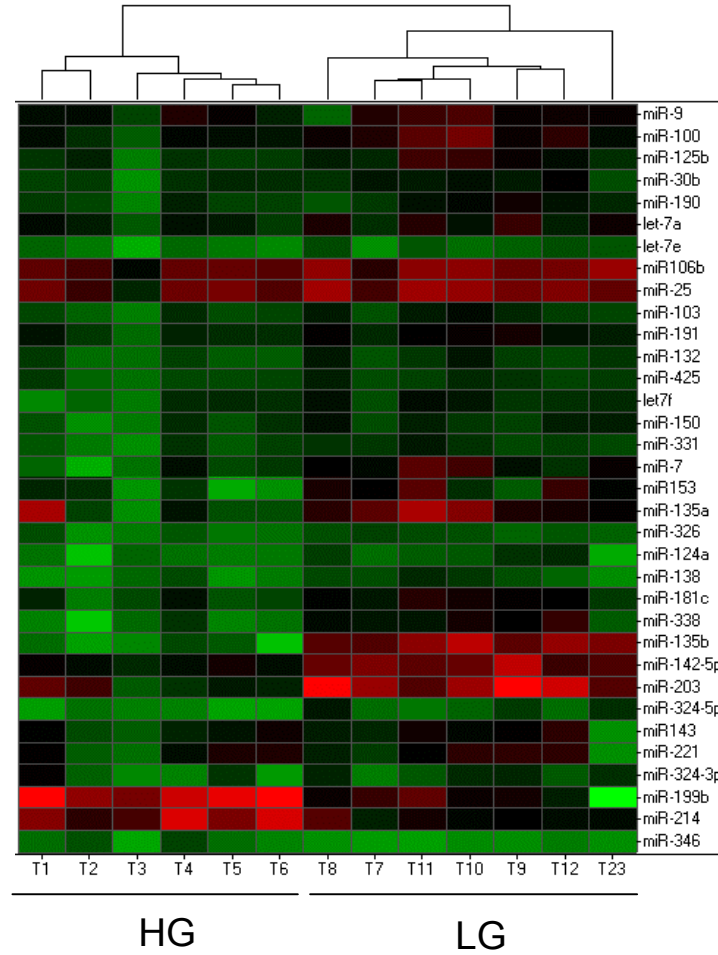

**B**

**Downregulated\***

- Let-7a
- Let-7e
- Let-7f
- miR-7
- miR-9
- miR-25
- miR-30b
- miR-100
- miR-103
- miR-106b
- miR-124a
- miR-125b
- miR-132
- miR-135a
- miR-135b
- miR-138
- miR-142-5p
- miR-143
- miR-150
- miR-153
- miR-181c
- miR-190
- miR-191
- miR-203
- miR-221
- miR-324-3p
- miR-324-5p
- miR-326
- miR-331
- miR-338
- miR-346
- miR-425

**Upregulated\***

- miR-199b
- miR-214

\*, Gli<sup>high</sup> versus Gli<sup>low</sup> MB

**Ferretti et al., Supplementary Fig. 1**
