# Supplementary material
Source: PubMed Central journal article supplement (PMC2567402)
Supplement: emboj2008172s3.pdf [file emboj2008172s3.pdf]

### Smo 3'UTR

1 GCCTGCAGAGCAGGACCTGGGACAGGAAAGAGAGGAACCAATACCTTCAA  
hsa mir-326

51 GGCTCTTCTCCTCACCGAGCATGCTTCCCTAGGATCCCGTCTTCCAGAG

101 AACCTGTGGGCTGACTGCCCTCCGAAGAGAGTTCTGGATGTCTGGCTCAA  
151 AGCAGCAGGACTGTGGGAAAGAGCCTAACATCTCCATGGGGAGGCCTCAC  
hsa mir-125b

201 CCCAGGGACAGGGCCCTGGAGCTCAGGGTCTTGTCTTCTGCCCTGCCAGC

251 TGCAGCCTGGTTGGCAGCATCTGCTCCATCGGGGCAGGGGGTATGCAGAG  
301 CTTGTGGTGGGGCAGGAACGGTGGAGGCAGAGGTGACAGTTCCCAGAGTG  
351 GGCTTTGGTGGCCAGGGAGGCAGCCTAGCCTATGTCTGGCAGATGAGGGC  
401 TGGCTGCCGTTTTCTGGGCTGATGGGTGCCCTTTCCTGGCAGTCTCAGTC  
451 CAAAAGTGTTGACTGTGTCATTAGTCCTTTGTCTAAGTAGGGCCAGGGCA  
501 CCGTATTCTCTCCCAGGTGTTTGTGGGGCTGGAAGGACCTGCTCCCACA  
551 GGGGCCATGTCCTCTCTTAATAGGTGGCACTACCCCAAACCCATCTTTG  
hsa mir-203

601 TTCTCCTATATCCTCCTTCTTCTGTTCCATTTTCAGTTTCAGTTTCAGCGGT  
hsa mir-103

651 GCCAACCTCTTTGCGTTTCCTTTTTTGTGATGAGGACCCAGAGCTGCTGC

701 ACACACTCACCTCTAACCCCTCCCCTCGCTGCTGGGCCCCATCTCCACA

751 GGAGAGACTGGTTCAGCTCTAGGGCCTCAGTCTGGAGTGGGATAGGAGCA  
hsa mir-324-5p

801 GTGAGTGACAAAGCCTCTGAAAGATGCATCATCTCTTCCTCACACCCATT

851 TAGTGGGGGATGGGTCCTCTAGACTTGAGGGGCTACCCTGGGAAGCTGCC  
901 GTAGCTTCAGCCAGGCAAGAAAGCTTCTTCAACCTGCATAGCCGGTGGG  
951 TGAGGAGATTCCCACCTTCCATAGCCTCCAAACATGTTCCAAGCCCCA  
hsa mir-135a/b

1001 CTTTCAAGAATCAGACAGCAGGAAGCCATAGATGCTGGCTGGGTTCCAGG  
hsa mir-338

1051 TTATGGGGAGAAGAAATACAGTCAATAAAAGGTTTTTGTATAAA
