# Supplementary material
Source: PubMed Central journal article supplement (PMC2567402)

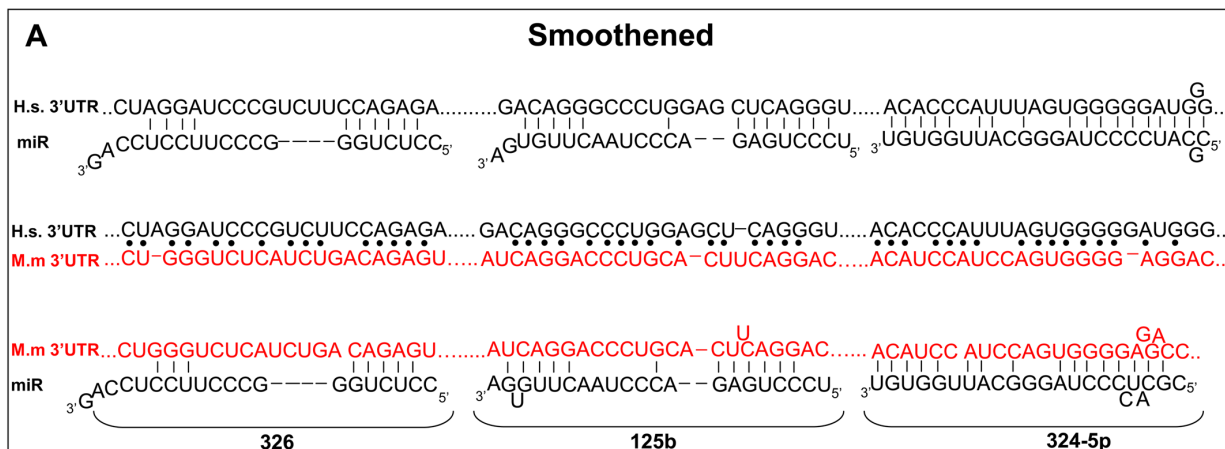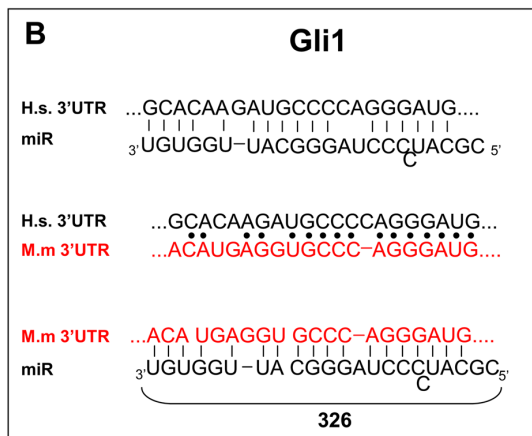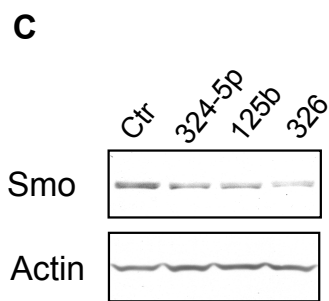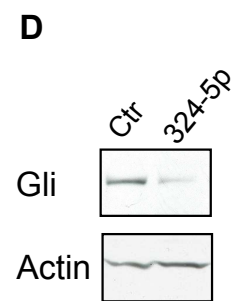

Supplement: emboj2008172s4.pdf [file emboj2008172s4.pdf]

### Gli1 3'UTR

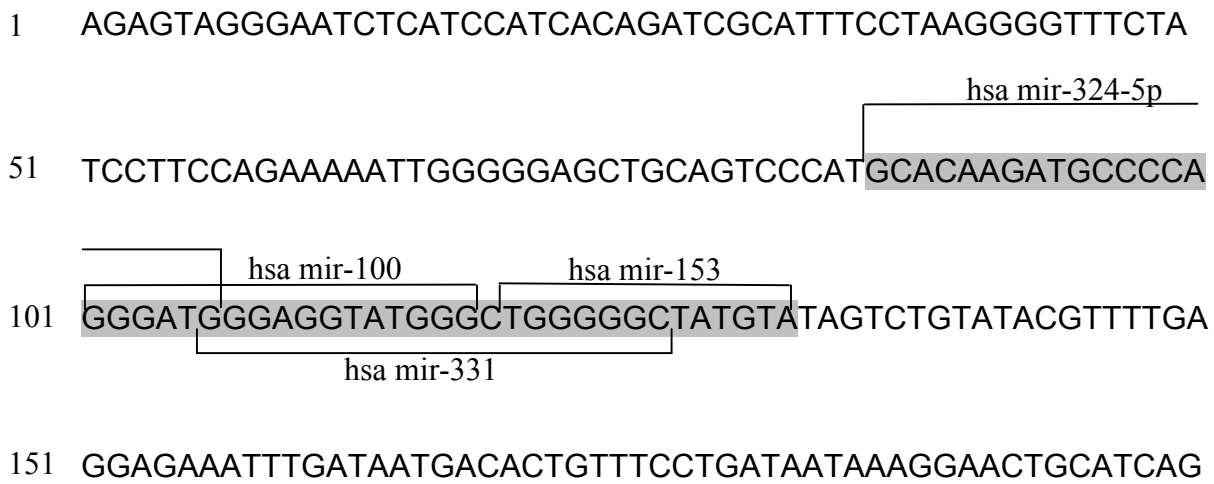

Ferretti et al., Supplementary Figure 4

Supplement: emboj2008172s5.pdf [file emboj2008172s5.pdf]
